# Supplementary material for: The Hidden Burden of Morphological Deprivation in Small and Medium Cities
Source: Research Square preprint supplement (doi:10.21203/rs.3.rs-8189204/v1), 2025-12-11
Supplement: Supplementary file 1 [file 50d3c838335cec7fb3d1488e.xlsx]

## Sheet: Sheet1
S. No	Region	ISO3	Country	Total_Area_sqkm	Deprived_Area_sqkm	Total_Pop_M	Deprived_Pop_M
1	Africa	DZA	Algeria	2962.65	22.251	19.326	0.527
2		AGO	Angola	1751.97	416.402	20.651	9.491
3		BEN	Benin	696.463	33.799	4.673	0.399
4		BWA	Botswana	196.11	5.416	0.549	0.023
5		BFA	Burkina Faso	618.2	275.149	5.104	3.014
6		BDI	Burundi	151.983	21.41	1.714	0.624
7		CMR	Cameroon	1179.22	172.38	15.199	4.301
8		CAF	Central African Republic	150.997	46.341	1.602	0.99
9		TCD	Chad	356.785	30.343	3.662	0.619
10		COM	Comoros	35.779	3.443	0.395	0.157
11		CIV	Côte d'Ivoire	1045.13	88.824	10.639	2.345
12		COD	Democratic Republic of the Congo	2737.04	536.38	43.592	18.325
13		DJI	Djibouti	31.803	5.821	0.421	0.167
14		EGY	Egypt	8605.89	373.268	76.178	18.647
15		GNQ	Equatorial Guinea	83.44	8.883	1.182	0.241
16		ERI	Eritrea	45.735	4.384	0.254	0.048
17		ETH	Ethiopia	1150.62	183.837	14.999	5.186
18		GAB	Gabon	138.07	8.052	0.745	0.074
19		GMB	Gambia	160.037	1.622	1.447	0.028
20		GHA	Ghana	2183.66	79.234	15.943	1.519
21		GIN	Guinea	624.038	61.437	5.008	1.119
22		GNB	Guinea-Bissau	80.504	0.035	0.78	0.001
23		KEN	Kenya	941.667	120.87	10.892	4.411
24		LSO	Lesotho	74.738	0.359	0.234	0.002
25		LBR	Liberia	319.897	6.045	2.217	0.085
26		LBY	Libya	1078.89	0.831	3.117	0.005
27		MDG	Madagascar	308.366	115.39	3.833	2.254
28		MWI	Malawi	361.872	93.336	2.369	1.353
29		MLI	Mali	614.275	66.99	5.961	1.608
30		MRT	Mauritania	163.12	36.056	1.706	0.503
31		MUS	Mauritius	143.265	0.173	0.561	0.001
32		MAR	Morocco	2062.52	41.513	19.62	2.357
33		MOZ	Mozambique	943.413	288.471	7.311	3.571
34		NAM	Namibia	79.621	20.074	0.406	0.241
35		NEG	Niger	363.825	117.138	4.623	2.531
36		NGA	Nigeria	11892	606.527	91.598	12.419
37		COG	Republic of Congo	277.152	71.255	4.109	2.402
38		RWA	Rwanda	259.257	42.476	1.649	0.478
39		SEN	Senegal	775.435	108.921	8.347	2.485
40		SLE	Sierra Leone	301.057	31.469	3.191	0.913
41		SOM	Somalia	298.046	112.969	8.295	5.402
42		ZAF	South Africa	6513.97	818.897	30.29	12.148
43		SSD	South Sudan	208.63	89.751	0.985	0.569
44		SDN	Sudan	1828.32	676.356	15.148	8.822
45		SWZ	Swaziland	36.85	0.45	0.097	0.002
46		TZA	Tanzania	1698.81	286.487	14.984	6.659
47		TGO	Togo	467.935	57.387	3.367	0.621
48		TUN	Tunisia	1191.48	19.552	5.736	0.291
49		UGA	Uganda	923.777	172.283	6.4	2.157
50		ESH	Western Sahara	28.872	0.021	0.23	0.001
51		ZMB	Zambia	1060.67	118.785	7.472	1.833
52		ZWE	Zimbabwe	878.252	32.267	3.102	0.261
53	Asia	AFG	Afghanistan	851.927	37.835	11.518	1.506
54		BGD	Bangladesh	13117.4	349.338	68.543	17.574
55		KHM	Cambodia	460.171	4.431	3.039	0.185
56		IND	India	56033	1585.93	479.717	65.737
57		IDN	Indonesia	27731	607.567	146.689	11.63
58		IRN	Iran	6798.34	9.129	43.627	0.416
59		IRQ	Iraq	3041.16	57.647	28.483	1.632
60		JOR	Jordan	792.658	2.763	8.037	0.119
61		KAZ	Kazakhstan	1731.81	0	8.223	0
62		KGZ	Kyrgyzstan	367.713	0.245	2.312	0.01
63		LAO	Laos	185.975	0	0.448	0
64		LBN	Lebanon	466.805	2.288	2.578	0.094
65		MYS	Malaysia	3582.98	0.665	16.911	0.03
66		MDV	Maldives	7.947	0.64	0.21	0.066
67		MNG	Mongolia	166.111	0.357	1.406	0.005
68		MMR	Myanmar	1988.58	14.684	17.258	0.572
69		NPL	Nepal	472.167	32.416	4.955	1.363
70		PRK	North Korea	1259.42	0.653	11.692	0.031
71		PAK	Pakistan	8314.01	540.792	95.763	23.895
72		PSE	Palestina	711.849	3.41	4.967	0.079
73		PHL	Philippines	5475.93	368.283	44.384	12.472
74		LKA	Sri Lanka	1967.14	5.991	6.981	0.184
75		SYR	Syria	1253.13	18.735	11.56	0.725
76		TJK	Tajikistan	461.335	0.216	2.656	0.007
77		THA	Thailand	4465.27	11.18	24.775	0.345
78		TLS	Timor-Leste	42.725	1.86	0.378	0.036
79		TKM	Turkmenistan	378.459	0	1.976	0
80		UZB	Uzbekistan	2937.8	0.412	12.282	0.028
81		VNM	Vietnam	7655.17	227.86	38.804	7.635
82		YEM	Yemen	538.828	13.302	8.138	0.828
83	Latin America and the Caribbean	ARG	Argentina	5135.19	522.077	28.393	3.105
84		BLZ	Belize	16.907	5.956	0.074	0.036
85		BOL	Bolivia	943.765	209.409	6.537	1.691
86		BRA	Brazil	20372.2	1055.32	117.923	16.064
87		COL	Colombia	2652.63	199.918	31.596	4.306
88		CRI	Costa Rica	503.807	4.221	2.46	0.043
89		CUB	Cuba	990.209	163.839	5.02	1.758
90		DOM	Dominican Republic	998.662	156.586	7.142	1.842
91		ECU	Ecuador	1256.55	130.559	9.479	1.559
92		SLV	El Salvador	501.004	63.379	2.72	0.621
93		GTM	Guatemala	932.538	176.211	5.433	1.755
94		HTI	Haiti	529.177	285.754	3.887	2.681
95		HND	Honduras	553.766	112.906	4.086	1.32
96		JAM	Jamaica	321.251	30.21	1.225	0.167
97		MEX	Mexico	12412.9	1513.24	68.978	12.233
98		NIC	Nicaragua	388.62	89.944	2.584	0.818
99		PAN	Panama	453.096	9.763	2.315	0.166
100		PRY	Paraguay	679.112	162.525	2.26	0.516
101		PER	Peru	1848.58	388.524	17.666	3.969
102		SUR	Suriname	85.436	0.844	0.237	0.008
103		VEN	Venezuela	3256.38	289.267	18.355	2.835
