# Supplementary material for: The Hidden Burden of Morphological Deprivation in Small and Medium Cities
Source: Research Square preprint supplement (doi:10.21203/rs.3.rs-8189204/v1), 2025-12-11
Supplement: Supplementary file 2 [file a8f609e2305bded73c4bd1a2.xlsx]

## Sheet: Sheet1
Domain	Variable Name	Code	Definition	Formula	Unit
Population / Area	Population	POP_SEG	Estimated population in the segment	-	Persons
	Segment area	AREAHA_SEG	Land area of the segment	-	Hectares
	Population density	i1_pop_area	Average population per hectare	POP_SEG / AREAHA_SEG	Persons / ha
	Pop-parcel ratio	i2_pop_par	Population per parcel	POP_SEG / PAR_N_SEG	Persons/parcel
	Pop-untouched parcel ratio	i3_pop_paru	Population per parcel without road access	POP_SEG / PARU_N_SEG	Persons/parcel
Roads / Connectivity	Road length	ROAD_SEG	Total road length within the segment	-	Meters
	Pop-road ratio	i4_pop_roads	Population per unit of road length	POP_SEG / ROAD_SEG	Persons/meter
	Road density	i7_roads_area	Road length per hectare	ROAD_SEG / AREAHA_SEG	m / ha
	Roads per parcel	i9_roads_par	Road length per parcel	ROAD_SEG / PAR_N_SEG	m / parcel
	Roads per untouched parcel	i10_roads_paru	Road length per untouched parcel	ROAD_SEG / PARU_N_SEG	m / parcel
Parcels / Access	Number of parcels	PAR_N_SEG	Total number of parcels in the segment	-	Count
	Untouched parcels	PARU_N_SEG	Parcels without road access	-	Count
	Share of untouched parcels	PARU_P_SEG	Proportion of parcels without road access	PARU_N_SEG / PAR_N_SEG	%
	Median untouched parcel area	PARU_A_SEG	Median area of parcels without road access	-	m²
	Parcel area CV	PAR_CV_SEG	Coefficient of variation of parcel areas	-	Dimensionless
	Avg. parcel area	i5_par_area	Average parcel size	AREAHA_SEG / PAR_N_SEG * 10,000	m²
	Avg. untouched parcel area	i6_paru_area	Average area of untouched parcels	AREAHA_SEG / PARU_N_SEG * 10,000	m²
	Untouched parcel share	i8_paru_par	Ratio of untouched parcels to total parcels	PARU_N_SEG / PAR_N_SEG	%
Buildings / Morphology	Building area	B_AREA_SEG	Total footprint area of buildings	-	m²
	Avg. building size	B_AVG_SEG	Mean building footprint area	-	m²
	CV of building size	B_CV_SEG	Coefficient of variation of building sizes	-	Dimensionless
